# Supplementary material for: Tungstate based poly(ionic liquid) entrapped magnetic nanoparticles: a robust oxidation catalyst
Source: Royal Society of Chemistry journal article supplement (doi:10.1039/c3gc41307a), 2013-01-01
Supplement: c3gc41307a.pdf [file c3gc41307a.pdf]

# **Tungstate based poly(ionic liquid) entrapped magnetic nanoparticles: a robust oxidation catalyst**

Ali pourjavadi,<sup>\*a</sup> Seyed Hassan Hosseini,<sup>a</sup> Firouz Matloubi Moghaddam,<sup>b</sup> Behzad Koushki

Foroushani,<sup>b</sup> Craig Bennett<sup>c</sup>

<sup>a</sup> *Polymer Research Laboratory, Department of Chemistry, Sharif University of Technology, Tehran, Iran*

<sup>b</sup> *Laboratory of Organic Synthesis and Natural Products, Department of Chemistry, Sharif University of Technology, Tehran, Iran*

<sup>c</sup> *Department of Physics, Acadia University, Wolfville, Nova Scotia, Canada*

*(E-mail address: purjavad@sharif.edu; Phone/fax: (982)166165311)*

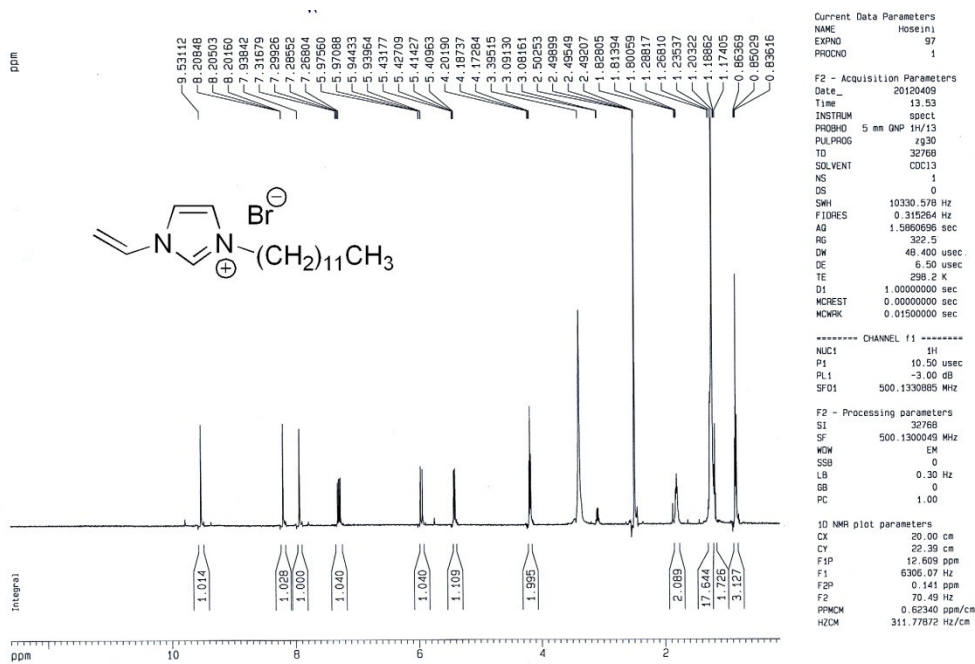

Fig. S1. <sup>1</sup>H NMR of 3-n-Decyl-1-vinylimidazolium bromide

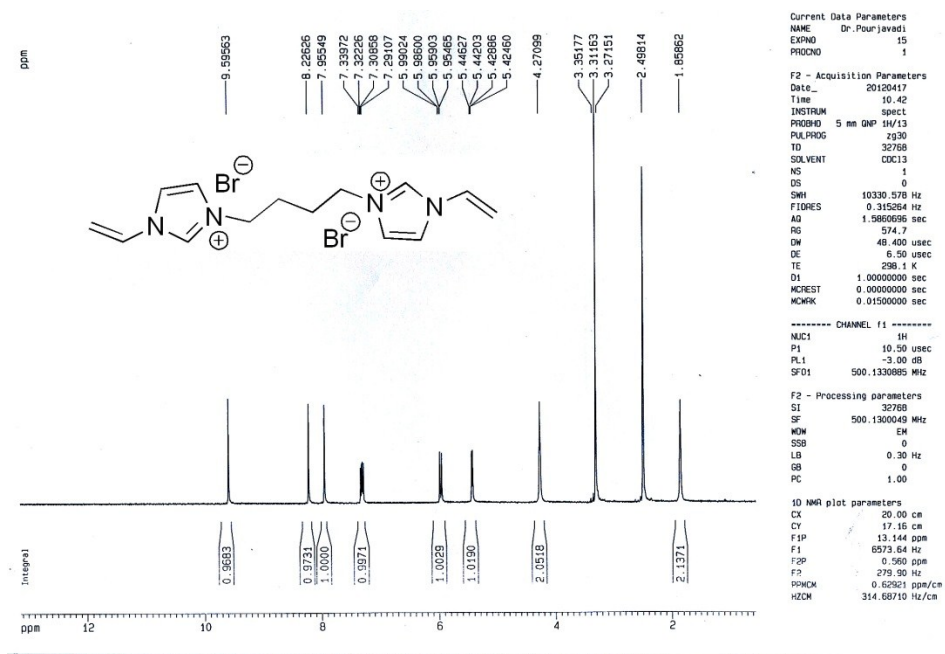

Fig. S2. <sup>1</sup>H NMR of 1,4-Butanediyl-3,30-bis-1-vinylimidazolium dibromide

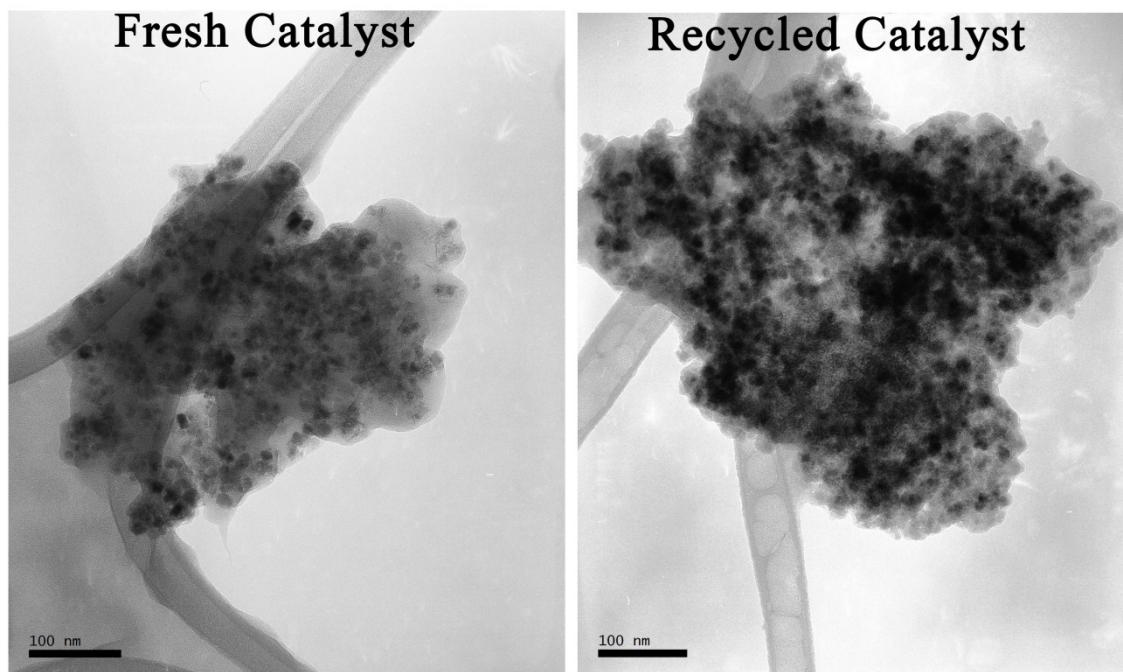

**Fig. S3.** TEM images of fresh catalyst and recycled catalyst

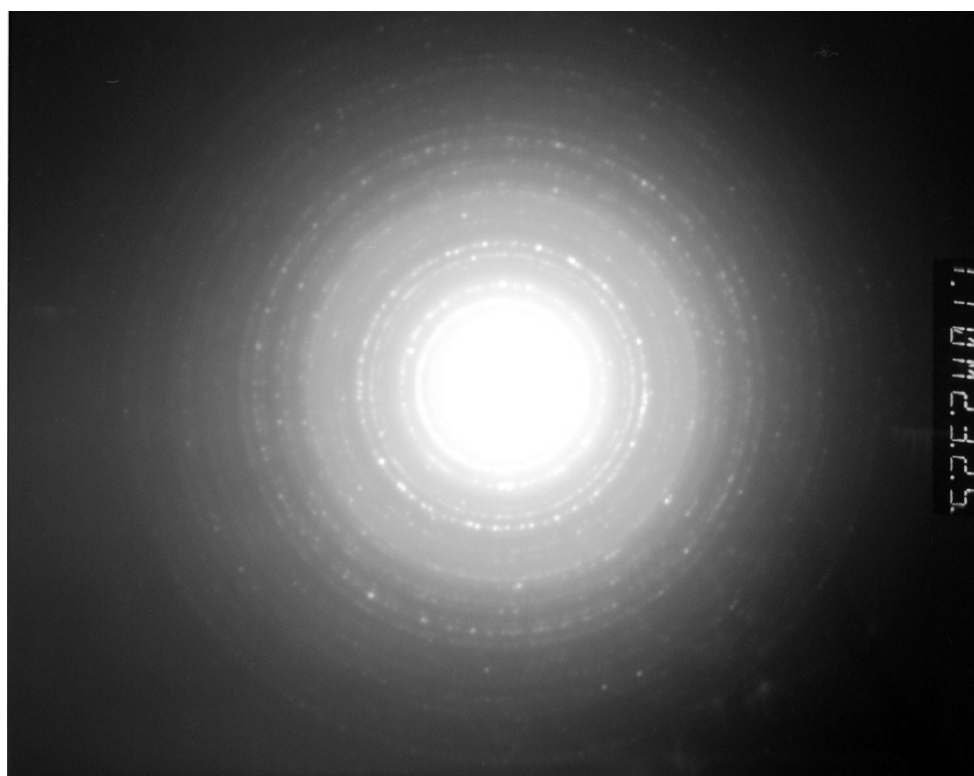

**Fig. S4.** Electron diffraction pattern of MNP@PILW

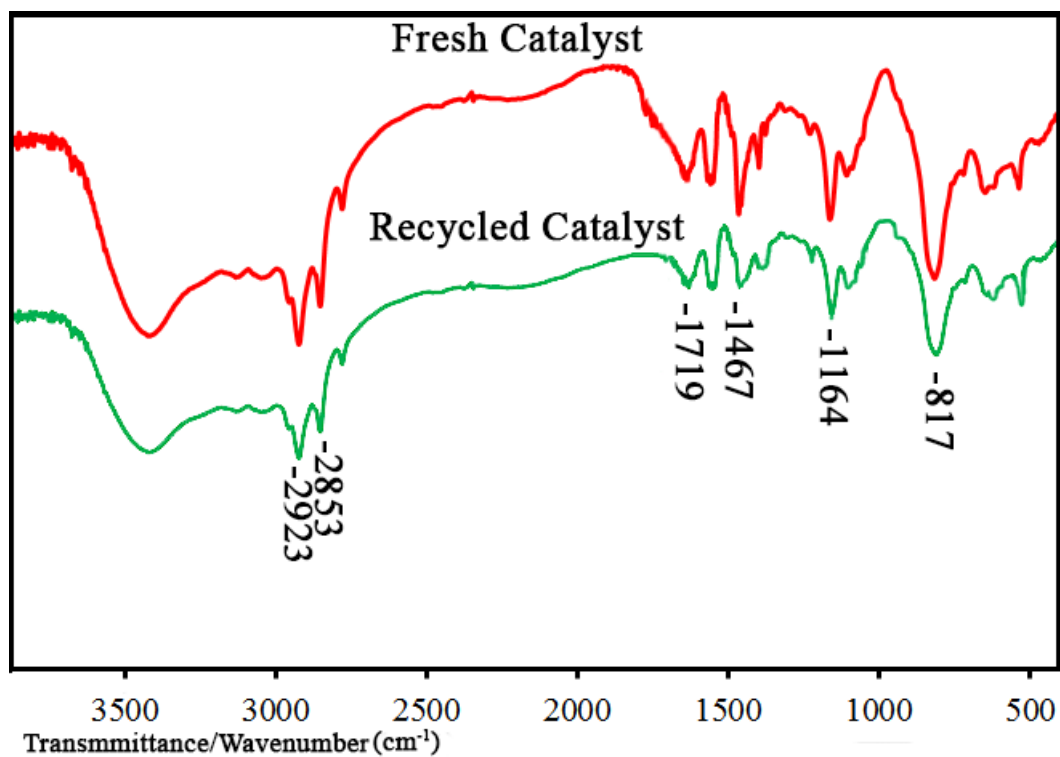

Fig. S5. FTIR spectra of fresh catalyst and recycled catalyst

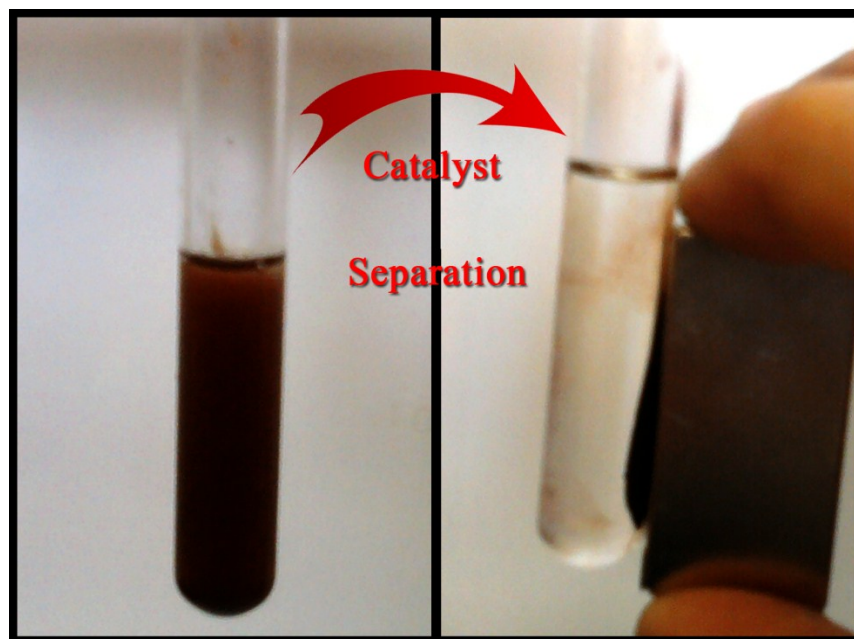

Fig. S6. Catalyst recycling
